# Supplementary material
Source: PubMed Central journal article supplement (PMC6495648)

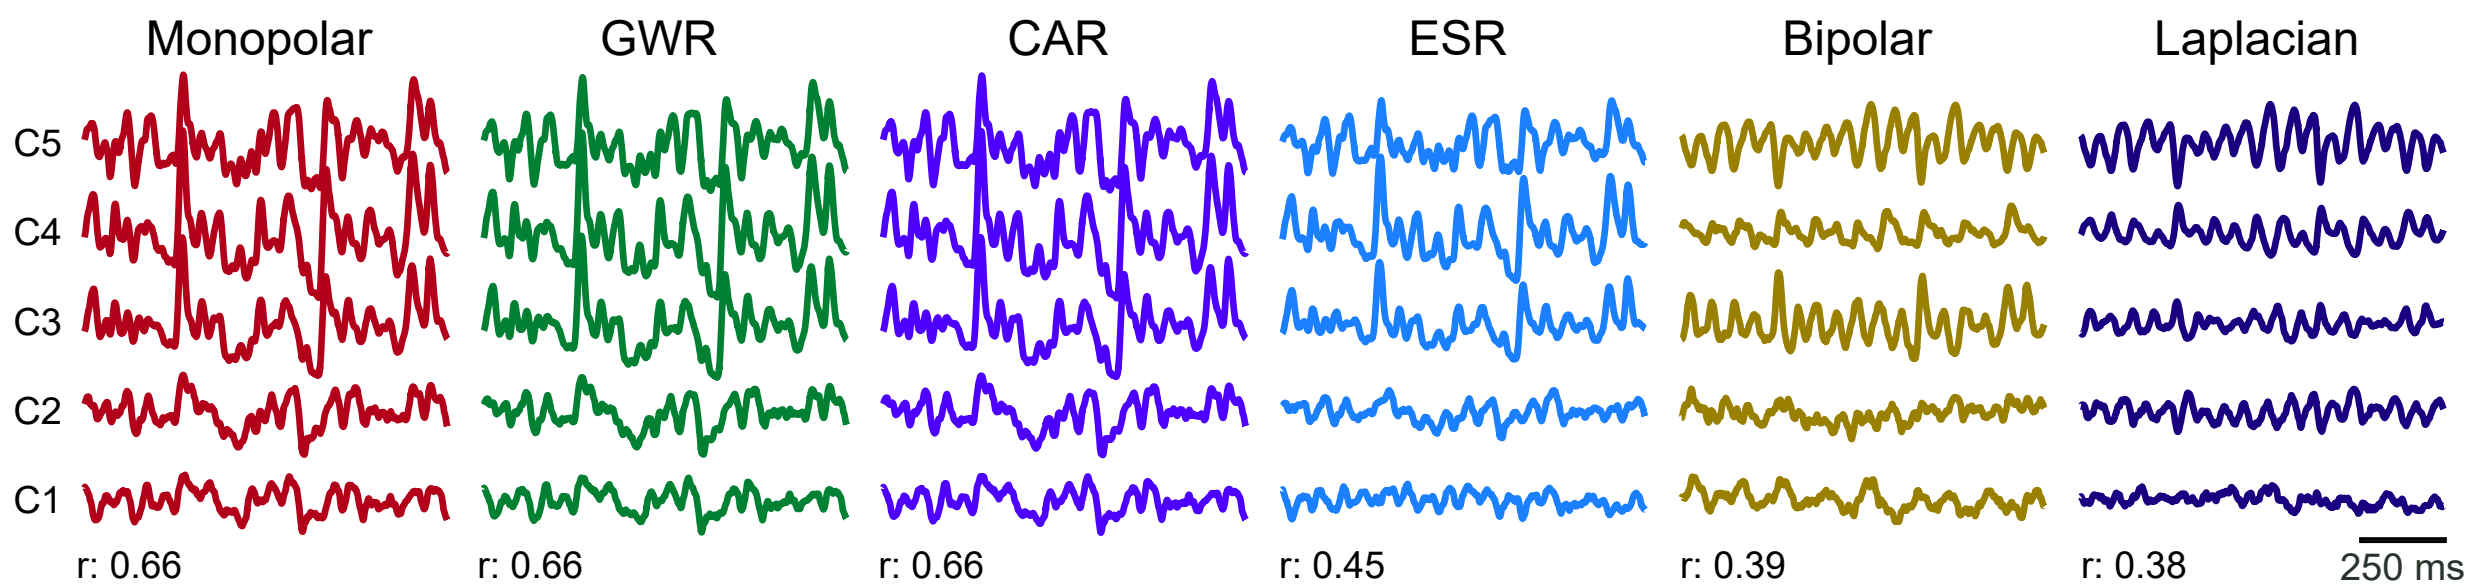

Supplement: NIHMS1017676-supplement-Supp1.pdf [file NIHMS1017676-supplement-Supp1.pdf]

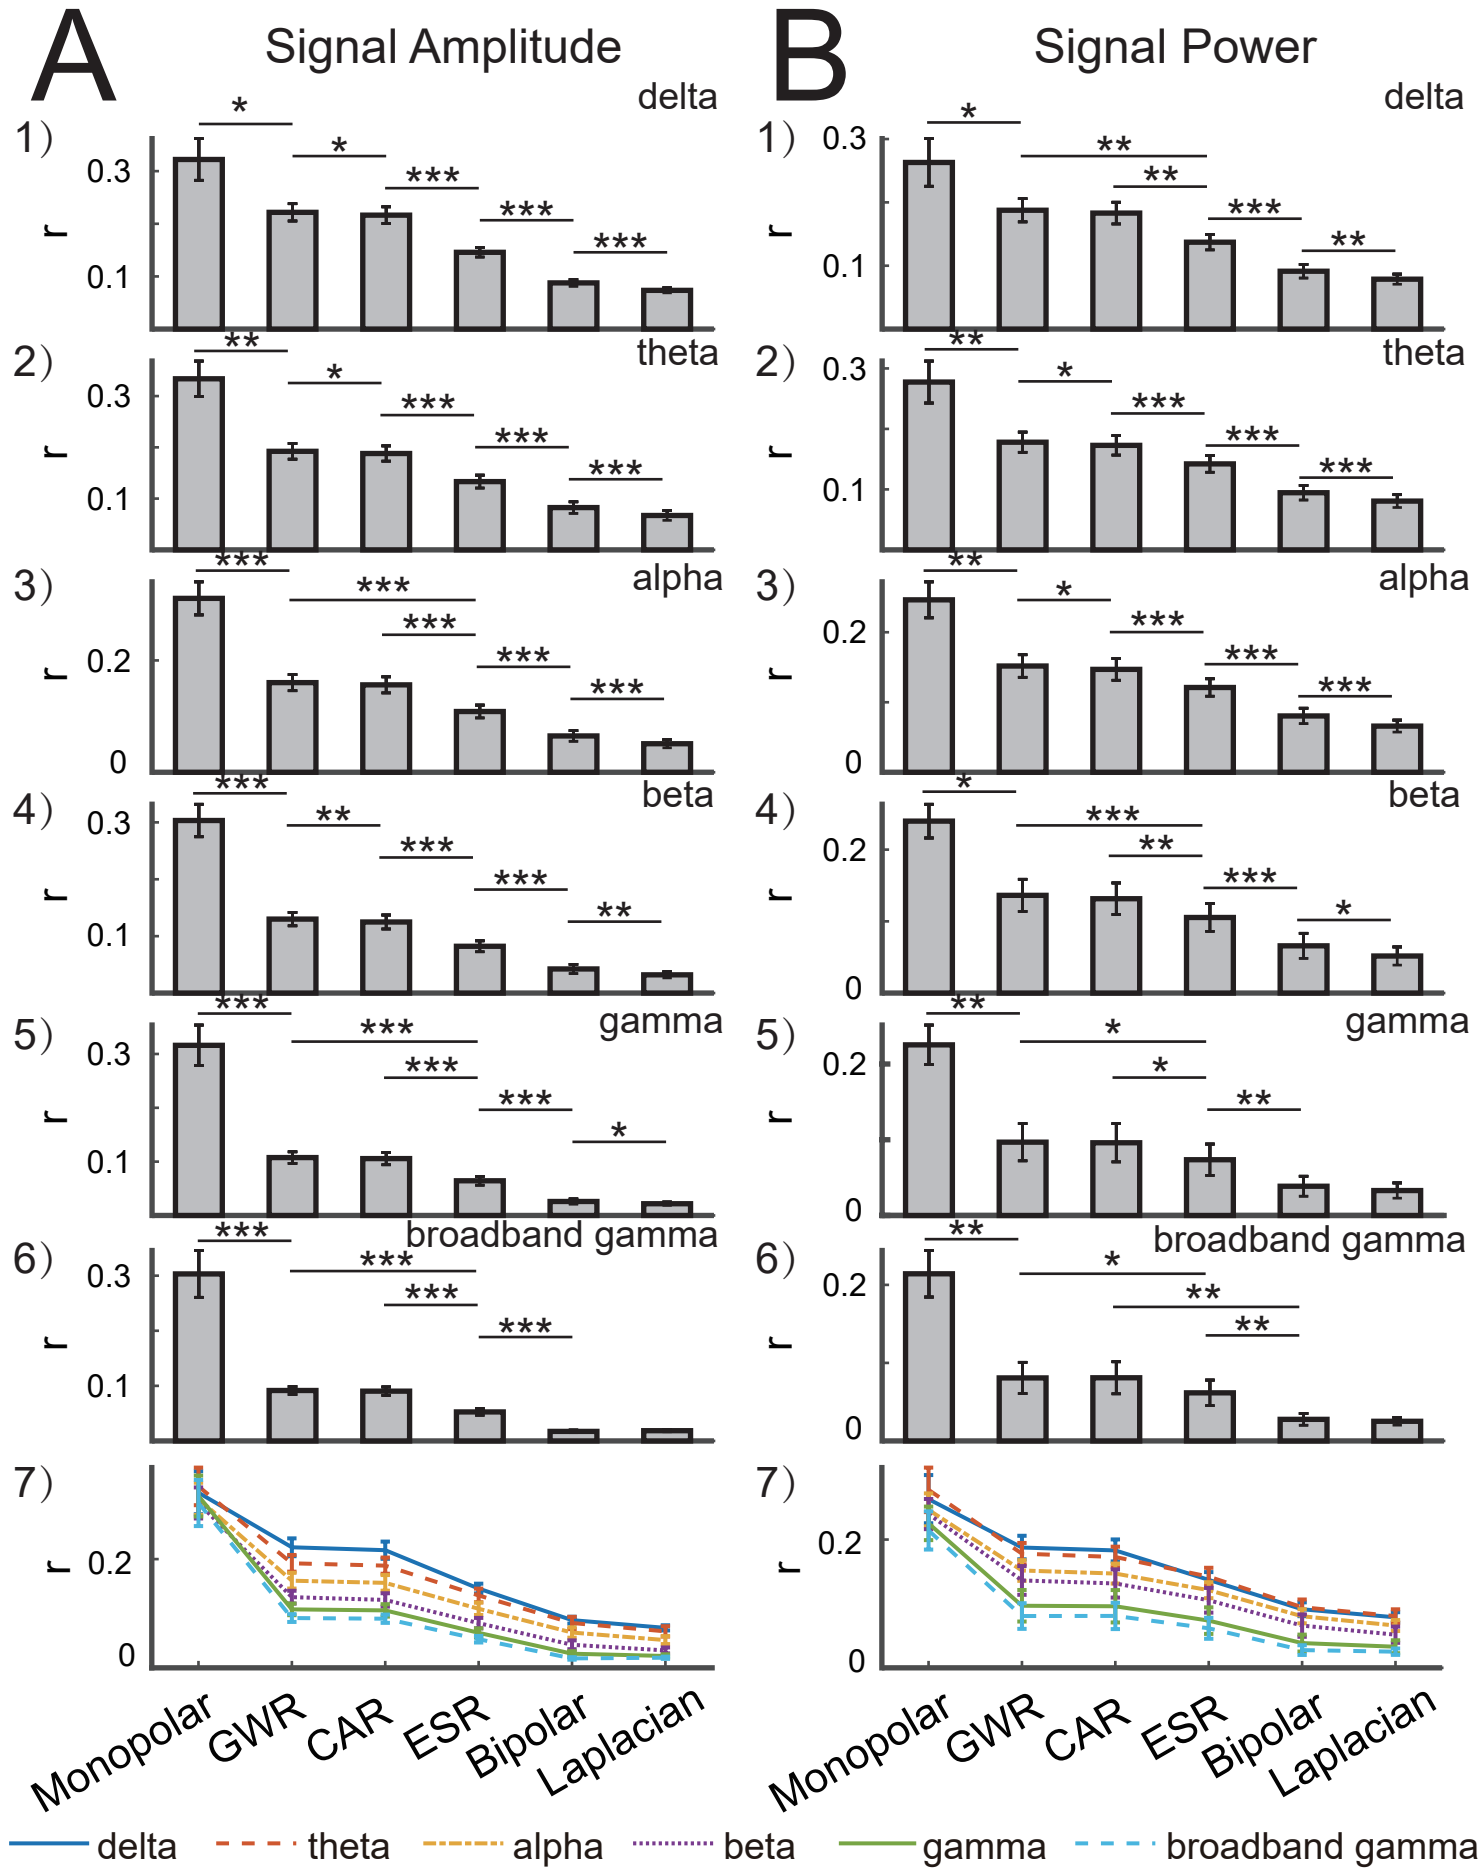

Supplement: NIHMS1017676-supplement-Supp2.pdf [file NIHMS1017676-supplement-Supp2.pdf]

Monopolar

GWR

CAR

ESR

Bipolar

Laplacian

C4

C3

C2

C1

EMG

$R^2: 0.42$

$R^2: 0.60$

$R^2: 0.60$

$R^2: 0.61$

$R^2: 0.54$

$R^2: 0.57$

250 ms

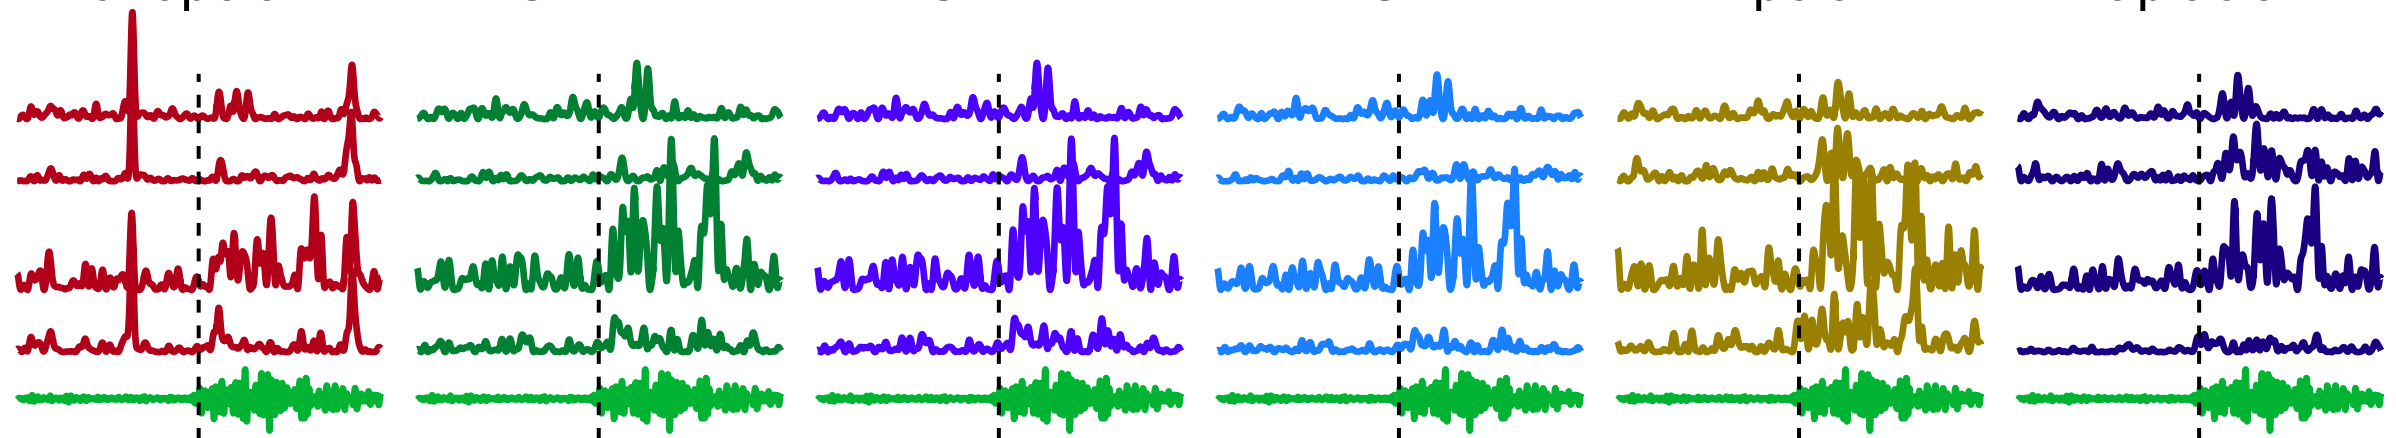

Supplement: NIHMS1017676-supplement-Supp3.pdf [file NIHMS1017676-supplement-Supp3.pdf]

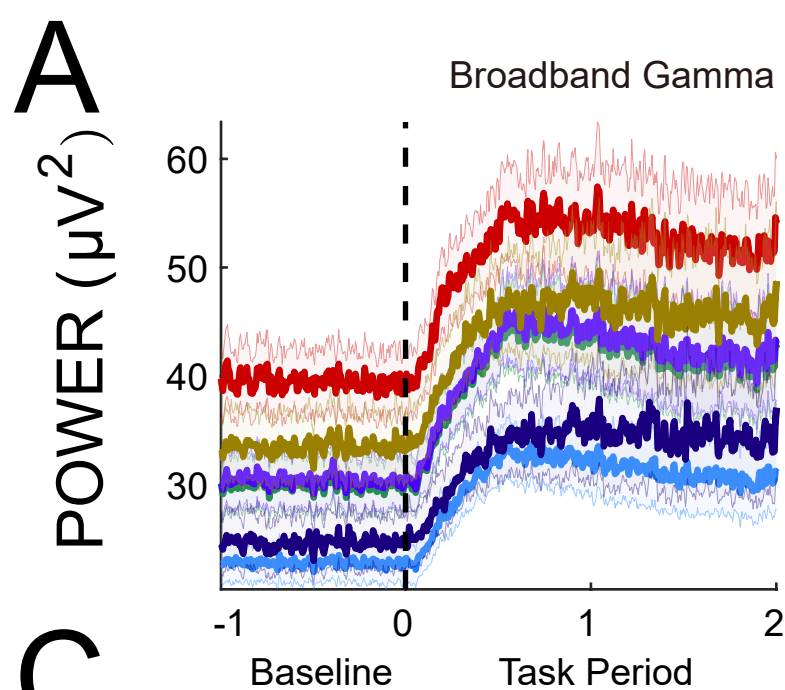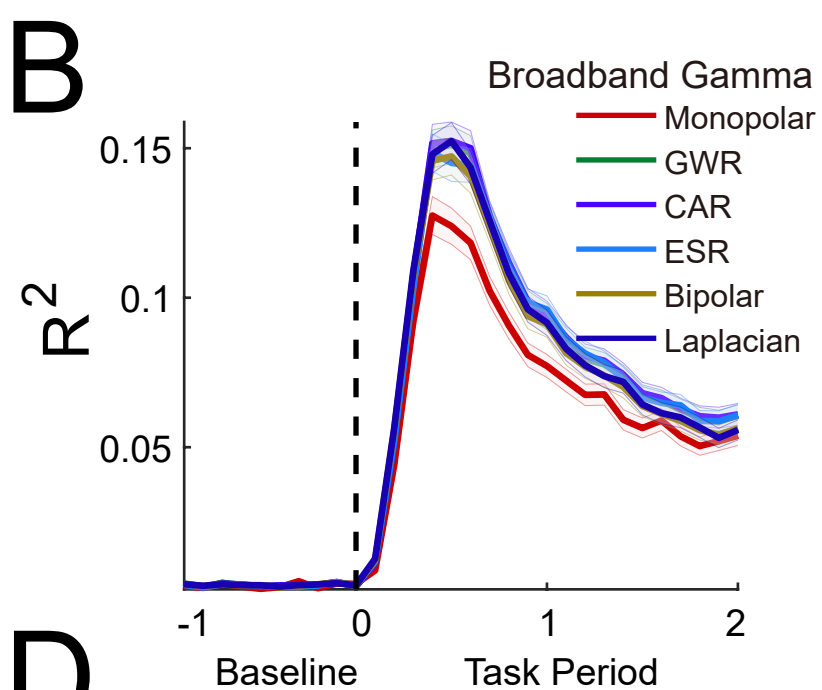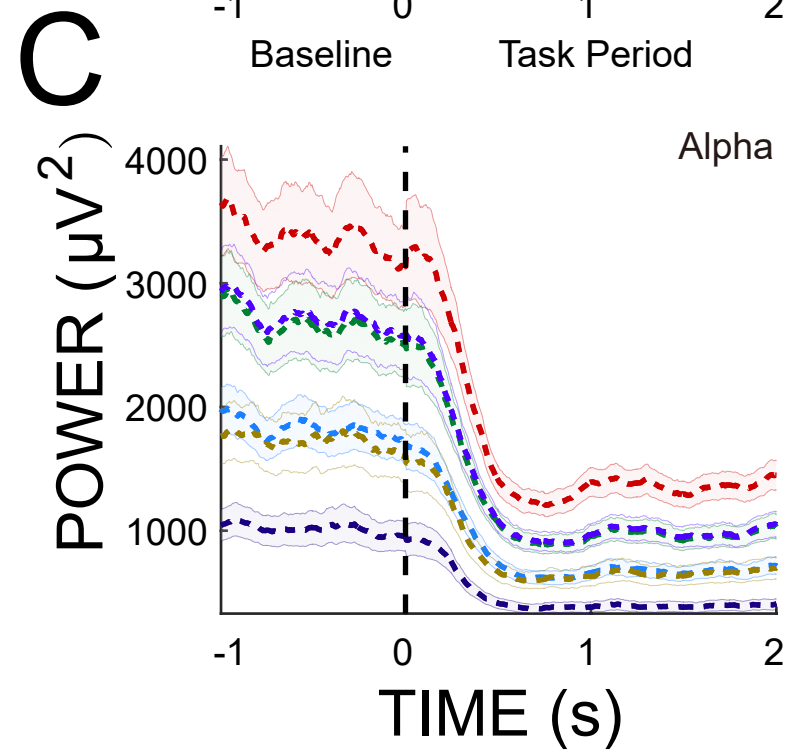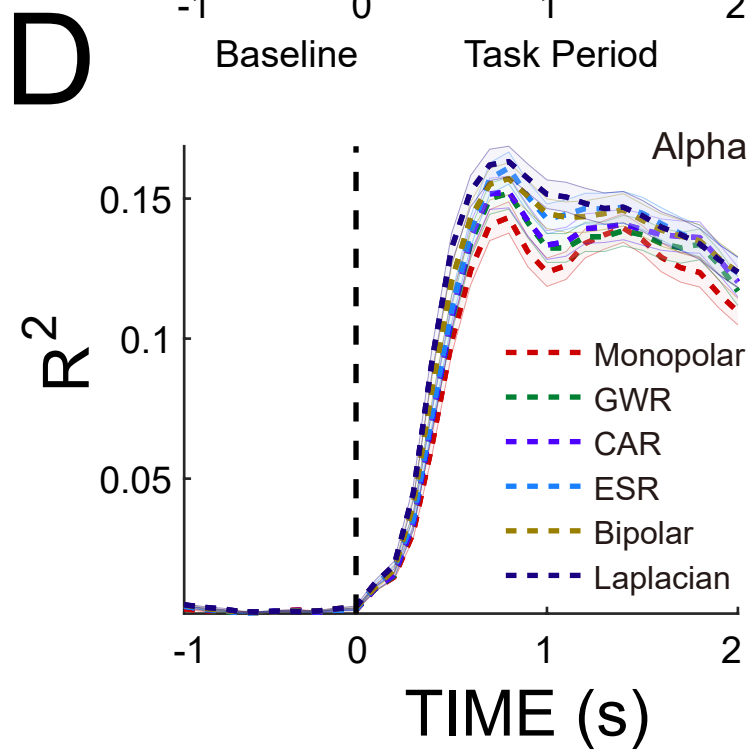

Supplement: NIHMS1017676-supplement-Supp4.pdf [file NIHMS1017676-supplement-Supp4.pdf]
